# Supplementary material
Source: publisher figshare collection journal article supplement (https://acs.figshare.com/ndownloader/files/4566604)
Supplement: Supplementary file 1 [file 4566604]

## Supporting information for

# “Selective electroless copper deposition on self-assembled dithiol monolayers”

*Dmitry Aldakov, Yvan Bonnassieux, Bernard Geffroy, and Serge Palacin*

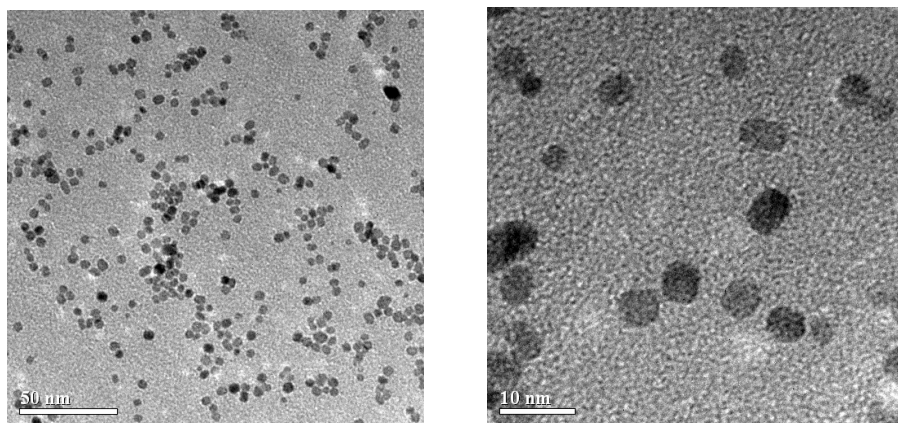

**Figure 1.** TEM micrographs of Pd nanoparticles

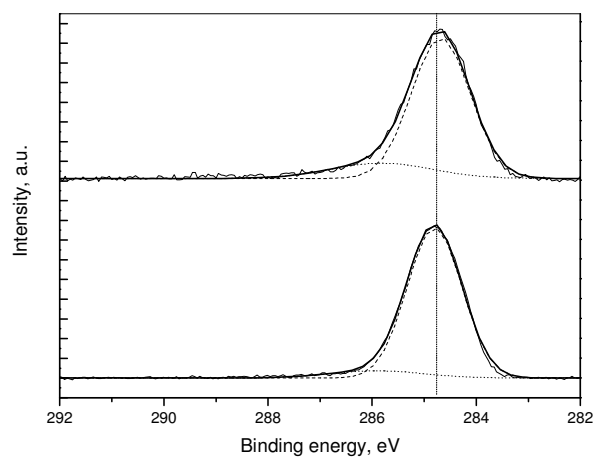

**Figure 2.** Carbon XPS spectra of Au/HDT monolayer (bottom) and Au/HDT/Pd (top). Fitted peaks of C 1s and its oxidized form are represented by dashed and dotted lines respectively.

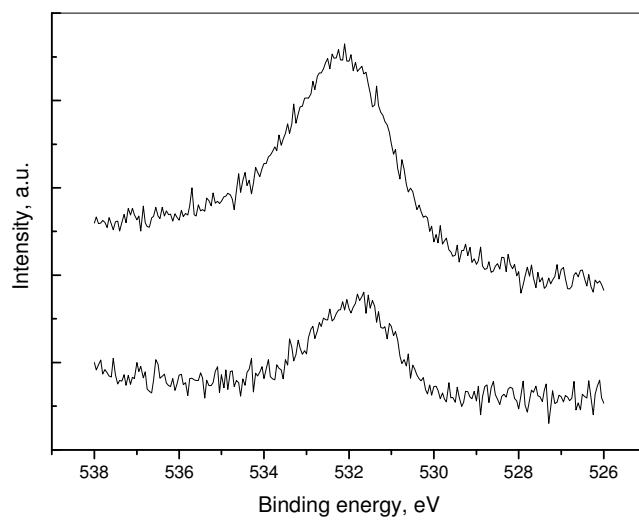

**Figure 3.** Oxygen XPS spectra of Au/HDT monolayer (bottom) and Au/HDT/Pd (top).
